# Supplementary material for: Study protocol for a randomised controlled trial examining the association between physical activity and sleep quality in children with autism spectrum disorder based on the melatonin-mediated mechanism model
Source: PubMed Central journal article supplement — BMJ Open. 2018 Apr 13;8(4):e020944. doi: 10.1136/bmjopen-2017-020944 (PMC5905756; doi:10.1136/bmjopen-2017-020944), 2018-04-13
Supplement: bmjopen-2017-020944supp001.pdf [file bmjopen-2017-020944supp001.pdf]

## 同意書

### 「體力活動與自閉症小童睡眠質素及褪黑激素的關係」研究

#### 研究目的

香港教育大學健康與體育學系現與香港中文大學醫學院精神科及香港理工大學護理學系正進行一項關於「體力活動與自閉症小童睡眠質素及褪黑激素的關係」的隨機對照試驗項目，目的是調查體力活動能否改變自閉症小童的褪黑激素分泌，從而改善他們的睡眠質素。

#### 研究程序

是項研究對象為小三至小六的自閉症學童。他們會在學校課堂或任何在課堂以外在研究人員的安排下進行體力活動共三次評估，評估內容如下：

1. 填寫四份問卷表格；
2. 收集一天的兒童尿液樣本（所需之尿液樣本收集，研究助理會直接聯絡家長約定交收時間）；
3. 讓每位兒童必須連續七天攜帶加速度計一個加速計。

其三次評估分別為：前測(第一星期)，後測(第十三星期)，跟進測試 (第二十五星期)。

項目內的所有活動及各種評估將會由專業研究團隊負責，並且不會收取任何費用，而每位參加者的家長將可獲得超市現金券\$500 元以表感謝。

#### 研究地點

研究地點分別為：運動技巧訓練會於 貴子女所屬學校進行，而睡眠質素評估及褪黑激素尿液測試會於閣下家中進行。

#### 潛在風險

此研究並沒有其他潛在風險。在進行運動技巧訓練，如有需要，研究人員會提供食水。

#### 研究裨益

參加者可以從中了解自己的體力活動及睡眠質素。你們的參與，將對於日常設計自閉症兒童的運動課程研究有極大的貢獻。

#### 個人私隱

在研究過程中所收集的資料，只供作研究用途，個人資料將絕對保密。所有資料（包括個人及學校資料）將以代碼記錄及研究，以保障閣下的私隱。資料將會存放於研究員的辦公室，並鎖於櫃內，只有有關研究隊伍才可接觸該資料。你可隨時要求檢視錄影記錄，而我們可應你的要求刪除錄影記錄資料。所有資料將會在完全收集後六個月內進行分析，然後所有資料將會被銷毀。

#### 參與及退出

參與純屬自願性質，參與與否將不會對閣下之學業成績構成任何影響。閣下可隨時提出終止，有關決定將不會引致任何不良後果。

#### 疑問

如閣下想獲得更多有關這項研究的資料,請與首席研究員謝采揚博士聯絡 (電話：29488074) ，請閣下填妥以下回條，以表示是否同意參與是項研究。如對是項研究有任何疑問，請現在提

出。如日後對是項研究有任何查詢，敬請聯絡首席研究員謝采揚博士（電話：29488074，電郵：andytcy@eduhk.hk）。如閣下或 貴子女對這項研究的操守有任何意見，可隨時與香港教育大學人類實驗對象操守委員會聯絡(電郵: hrec@eduhk.hk; 地址:香港教育大學研究與發展事務處。在此多謝你的參與。

## 家長回條

本人 \_\_\_\_\_ (家長姓名) 已有足夠機會詢問清楚明白有關這項研究的內容，並同意參加這項研究。

此外，本人亦 \*\* 同意 / 不同意 本人之兒女 \_\_\_\_\_ (學童名稱) \_\_\_\_\_ (學童班別) \_\_\_\_\_ (學童學號) 參與是項研究。[\*\* 請刪去不適用者]

\_\_\_\_\_  
家長聯絡電話

\_\_\_\_\_  
日期

\_\_\_\_\_  
家長姓名

\_\_\_\_\_  
家長簽署
